# Supplementary material for: A Critical Review of the Pharmacokinetics, Pharmacodynamics, and Safety Data of Antibiotics in Avian Species
Source: MDPI journal article supplement (doi:10.3390/antibiotics11060741), 2022-05-31
Supplement: s1 [file s1]

**Table S1.** Characteristics of included studies.

| Study               | Species<br>(English<br>name)    | Species<br>(scientific<br>name) | Dosing<br>regimen                                           | Sample<br>size (n) | Condition of<br>birds         | Time points for data<br>collection                                                                                        | Control              | Environ<br>ment                                  | Comments |
|---------------------|---------------------------------|---------------------------------|-------------------------------------------------------------|--------------------|-------------------------------|---------------------------------------------------------------------------------------------------------------------------|----------------------|--------------------------------------------------|----------|
| <b>Enrofloxacin</b> |                                 |                                 |                                                             |                    |                               |                                                                                                                           |                      |                                                  |          |
| [48]                | Caribbean<br>flamingo           | Phoenicopterus ruber            | PO 15mg/kg SD<br>SC 15mg/kg SD                              | 7<br>7             | Healthy<br>Healthy            | 0.25, 0.5, 1, 2,4,8,12, and 24h post-administration                                                                       | None                 | Have access to indoor facility & outdoor exhibit | -        |
| [45]                | Southern<br>crested<br>caracara | Caracara plancus                | IV 5 mg/kg SD<br>IM 10mg/kg SD                              | 4<br>4             | Healthy<br>Healthy            | 0,5,15,35min and 1,2,4,6,8,10,12,24,29,34h after injection<br>0,10,20,40min and 1,2,4,6,8,10,12,24,29,34h after injection | None<br>None         | -                                                | -        |
| [42]                | African<br>penguin              | Spheniscus demersus             | IV 15mg/kg SD<br>PO pill 15mg/kg<br>PO pill in fish 15mg/kg | 5<br>5<br>5        | Healthy<br>Healthy<br>Healthy | 0, 0.5, 1,2,4,8,12,24,36, and 48h                                                                                         | None<br>None<br>None | 24 °C                                            | -        |
| [35]                | Common<br>ostrich               | Struthio camelus                | IM 15mg/kg q12h x 3 days                                    | 6                  | Healthy                       | Before and at 10,20,30,45 min and at 1,1.5,2,3,4,6,8,12 and                                                               | None                 | -                                                | -        |

|      |                 |                                 |    |                  |    |         |                                                                                         |                                                                     |      |                               |
|------|-----------------|---------------------------------|----|------------------|----|---------|-----------------------------------------------------------------------------------------|---------------------------------------------------------------------|------|-------------------------------|
|      |                 |                                 | SC | 15mg/kg          | 6  | Healthy | 24h after the first administration. Before and 2h after each subsequent administration. | None                                                                |      |                               |
| [44] |                 |                                 | IV | 5mg/kg           | SD | 5       | Healthy                                                                                 | 0,5, 10,15,30, 45,60, 90 min                                        | None | - -                           |
|      |                 |                                 | IM | 5mg/kg           | SD | 5       | Healthy                                                                                 | and 2,3,4,6,8,10,12, 24,48 and 72h after dosing                     | None |                               |
| [46] | Emu             | <i>Dromaius novaehollandiae</i> | IV | 2.2 ± 0.03 mg/kg | SD | 3       | kyphosis, lordosis and scoliosis since young but otherwise healthy                      | 7.5, 15, 30, 60, 90 min and 2,4,6,8, 12,16 and 24h post-injection   | None | Kept indoors -                |
| [34] | Greater rhea    | <i>Rhea americana albescens</i> | IM | 15mg/kg          | SD | 6       | Healthy                                                                                 | 0,5,10,15,30,45,60,90 mins and at 2,3,4,6,8,10, 24,48h after dosing | None | - -                           |
| [4]  | Houbara bustard | <i>Chlamydotis undulata</i>     | IM | 10mg/kg          | SD | 8       | Healthy                                                                                 | 0.25, 0.50, 0.75, 1, 2, 3, 4, 6, 8, 10, 12, 24,48h                  | None | 19.8 - -                      |
|      |                 | <i>macqueenii</i>               | PO | 10mg/kg          | SD | 8       | Healthy                                                                                 |                                                                     | None | 45.7°C, 13.3-13.5h of light   |
|      |                 |                                 | IV | 10mg/kg          | SD | 8       | Healthy                                                                                 | 0.25, 0.50, 0.75, 1, 2, 3, 4, 6, 8, 10, 12, 24,48h and at 5min      | None | 26.5 - 46.7°C, 12.8h of light |

|      |                     |                          |                          |                                                                             |                                                                    |      |            |                                                     |
|------|---------------------|--------------------------|--------------------------|-----------------------------------------------------------------------------|--------------------------------------------------------------------|------|------------|-----------------------------------------------------|
| [37] | Red-tailed hawk     | Buteo jamaicensis        | PO in prey 8             | Chronic muco-skeletal or ocular abnormalities present but otherwise healthy | 0.25, 0.5, 1, 2, 4, 8, 12, 24, 48h after administration            | None | -          | Fasted 12h before and 13h after drug administration |
|      |                     |                          | 15mg/kg SD               |                                                                             |                                                                    |      |            |                                                     |
|      |                     |                          | IM 15mg/kg SD            |                                                                             |                                                                    |      |            |                                                     |
|      | Great horned owl    | Bubo virginianus         | IV 15mg/kg SD 8          |                                                                             |                                                                    |      |            |                                                     |
|      |                     |                          | PO in prey 5             |                                                                             |                                                                    |      |            |                                                     |
|      |                     |                          | 15mg/kg SD               |                                                                             |                                                                    |      |            |                                                     |
| [36] | African grey parrot | Psittacus erithacus      | IM 15mg/kg SD            | Healthy                                                                     | 0.5, 1,2,4,6,8,12,24h after administration                         | None | Indoors, - | controll ed temperature and lighting                |
|      |                     |                          | PO 3mg/kg SD             | Healthy                                                                     |                                                                    |      |            |                                                     |
|      |                     |                          | PO 15mg/kg SD            | Healthy                                                                     |                                                                    |      |            |                                                     |
|      |                     |                          | PO 30mg/kg SD            | Healthy                                                                     |                                                                    |      |            |                                                     |
|      |                     |                          | PO 30mg/kg q12 x 10 days | Healthy                                                                     |                                                                    |      |            |                                                     |
|      |                     |                          |                          |                                                                             |                                                                    |      |            |                                                     |
| [47] | Greater rhea        | Rhea americana albescens | IV 15mg/kg SD 6          | Healthy                                                                     | 0,5,10,15,30,45,60,90 mins and at 2,3,4,6,8,10,24,48h after dosing | None | -          | -                                                   |
|      |                     |                          |                          |                                                                             |                                                                    |      |            |                                                     |

|                      |                          |                        |                                                    |              |                    |                                                                       |                                    |                     |   |                                         |
|----------------------|--------------------------|------------------------|----------------------------------------------------|--------------|--------------------|-----------------------------------------------------------------------|------------------------------------|---------------------|---|-----------------------------------------|
| [49]                 | African grey parrot      | Psittacus erithacus    | 0.09, 0.19, 0.38, 0.75, 1.5 and 3.0 mg/mL x 7 days | 4 birds each | Healthy            | 8 am and 3pm on treatment days 4 and 7                                | 4 birds received unmedicated water | 13h light (7am-8pm) | - | -                                       |
|                      | Common pheasant          | Phasianus colchicus L. | IV 10mg/kg SD<br>PO 10mg/kg SD                     | 6<br>6       | Healthy            | 8:00-8:30 AM at 0.25, 0.5, 1,2,4,6,8,10,24h after drug administration | None                               | -                   | - | Fasted 12h prior to drug administration |
| <b>Marbofloxacin</b> |                          |                        |                                                    |              |                    |                                                                       |                                    |                     |   |                                         |
| [50]                 | Eurasian buzzard         | Buteo buteo            | IO 2mg/kg SD                                       | 5            | Healthy            | 0,5,15,30,45,60min and 2,4,6,8,10,12,24h                              | None                               | -                   | - | -                                       |
| [51]                 | Eurasian griffon vulture | Gyps fulvus            | IV 2mg/kg SD                                       | 6            | Healthy            |                                                                       | None                               | -                   | - | -                                       |
| [52]                 | Blue and gold macaw      | Ara araranua           | IV 2.5mg/kg SD<br>PO 2.5mg/kg SD                   | 10<br>10     | Healthy<br>Healthy | 0, 0.5, 1,3,6,12,24,48,72,96h after administration                    | None<br>None                       | Housed outdoors     | - | -                                       |
| [53]                 | Common ostrich           | Struthio camelus       | IV 5mg/kg SD<br>IM 5mg/kg SD                       | 6<br>6       | Healthy<br>Healthy | 0,5,10,15,30,45,60,90 min and 2,3,4,6,8,10,12,24,48,72h after dosing  | None<br>None                       | -                   | - | -                                       |
|                      | Common pheasant          | Phasianus colchicus L. | IV 5mg/kg SD<br>PO 5mg/kg SD                       | 6<br>6       | Healthy            | 8:00-8:30 AM at 0.25, 0.5, 1,2,4,6,8,10,24h after drug administration | -                                  | -                   | - | Fasted 12h prior to drug                |

| administration    |                  |                         |                         |    |         |                                                                 |      |                          |                        |           |   |   |
|-------------------|------------------|-------------------------|-------------------------|----|---------|-----------------------------------------------------------------|------|--------------------------|------------------------|-----------|---|---|
| [54]              | Eurasian buzzard | Buteo buteo             | IV 2mg/kg SD            | 4  | Healthy | 0,5,15,30,45,60min and 2,4,6,8,10,12,24,30h post-administration | None | -                        | -                      | -         | - | - |
| [56]              | Eurasian buzzard | Buteo buteo             | PO 10mg/kg SD           | 8  | Healthy | 0, 0.25, 0.5, 0.75, 1,2,4,8,6,12,24,36h,48h post-administration | None | Outdoor flight enclosure | Fasted before of study | 24h start | - | - |
| <b>Gentamicin</b> |                  |                         |                         |    |         |                                                                 |      |                          |                        |           |   |   |
| [57]              | Budgerigar       | Melopsittacus undulatus | IM 5mg/kg SD            | 20 | Healthy | 15,30,45,60,120minutes after drug administration                | -    | -                        | -                      | -         | - | - |
| [62]              | Scarlet macaw    | Ara macao               | IM 10mg/kg SD           | 20 | Healthy | 0.5,1,3,6,9, and 12h after drug administration                  | None | -                        | -                      | -         | - | - |
|                   |                  |                         | IM 10mg/kg SD           | 30 | Healthy |                                                                 |      |                          |                        |           |   |   |
|                   |                  |                         | IM 5mg/kg q12h x 7 days | 10 | Healthy |                                                                 |      |                          |                        |           |   |   |
|                   | Galah            | Eolophus roseicapilla   | IM 5mg/kg SD            | 15 | Healthy | 0.5,1,3,6,9, and 12h after drug administration                  | None | -                        | -                      | -         | - | - |
|                   |                  |                         | IM 10mg/kg SD           | 15 | Healthy |                                                                 |      |                          |                        |           |   |   |
|                   |                  |                         | IM 5mg/kg q12h x 7 days | 10 | Healthy |                                                                 |      |                          |                        |           |   |   |

|                 |                             |                          |                                  |        |                                                                          |                                                                                               |  |                                                        |                   |   |  |
|-----------------|-----------------------------|--------------------------|----------------------------------|--------|--------------------------------------------------------------------------|-----------------------------------------------------------------------------------------------|--|--------------------------------------------------------|-------------------|---|--|
|                 |                             |                          |                                  |        |                                                                          |                                                                                               |  | physiolog<br>ical saline                               |                   |   |  |
| [58]            | Great<br>horned owl         | Bubo<br>virginianus      | IM 10mg/kg<br>q12h x 5 days      | 8      | Healthy                                                                  |                                                                                               |  | 8 owls<br>given<br>sterile<br>saline                   | -                 | - |  |
| [59]            | Red-tailed<br>hawk          | Buteo<br>jamaicensis     | IV 10mg/kg<br>q12h x 4 days      | 5      | Permanently<br>crippled but                                              | Days 1,2, and 4                                                                               |  | None                                                   | -                 | - |  |
|                 |                             |                          | IV 20mg/kg<br>q12h x 6 days      | 5      | otherwise<br>healthy                                                     |                                                                                               |  | None                                                   | -                 | - |  |
| [60]            | Lanner<br>falcon            | Falco<br>biarmicus       | IM 5mg/kg OD<br>x 4 days         | 2      | Severe<br>respiratory<br>tract<br>infection<br>with rapid<br>weight loss | Not mentioned                                                                                 |  | none                                                   | -                 | - |  |
| <b>Amikacin</b> |                             |                          |                                  |        |                                                                          |                                                                                               |  |                                                        |                   |   |  |
| [61]            | Cockatiel                   | Nymphicus<br>hollandicus | IM 5mg/kg<br>q12h x 3 days       | 12     | Healthy                                                                  | before the sixth injection and<br>at 1.5, 3.3, 4.5, 6 and 7h<br>following the sixth injection |  | 2 birds<br>given IM<br>lactated<br>ringers<br>solution | Outdoor<br>aviary | - |  |
|                 | Ring-<br>necked<br>pheasant | Phasianus<br>colchicus   | IM 5mg/kg SD<br>IM 10mg/kg<br>SD | 5<br>7 | Healthy<br>Healthy                                                       |                                                                                               |  | None<br>None                                           |                   |   |  |

|      |                            |                         |    |         |      |                                     |                                                             |      |             |
|------|----------------------------|-------------------------|----|---------|------|-------------------------------------|-------------------------------------------------------------|------|-------------|
|      |                            |                         | IM | 20mg/kg | 3    | Healthy                             |                                                             | None |             |
|      |                            |                         | SD |         |      |                                     |                                                             |      |             |
|      | Greater sandhill crane     | Grus canadensis tabida  | IM | 5mg/kg  | SD 8 | Healthy                             |                                                             | None |             |
|      |                            |                         | IM | 10mg/kg | 1    | Healthy                             |                                                             | None |             |
|      |                            |                         | SD |         |      |                                     |                                                             |      |             |
|      |                            |                         | IM | 20mg/kg | 1    | Healthy                             |                                                             | None |             |
|      |                            |                         | SD |         |      |                                     |                                                             |      |             |
| [64] | Red-tailed hawks           | Buteo jamaicensis       | IV | 10mg/kg | SD 5 | Wing injuries but otherwise healthy | 0, 0.5, 1,2,4,6,8,10,18 and 24h post injection              | None | 21-23°C, -  |
|      |                            |                         | IM | 10mg/kg | 5    |                                     |                                                             | None | 10h light   |
|      |                            |                         | SD |         |      |                                     |                                                             |      |             |
|      | Great horned owl           | Bubo virginianus        | IV | 10mg/kg | SD 5 |                                     |                                                             | None |             |
|      |                            |                         | IM | 10mg/kg | 5    |                                     |                                                             | None |             |
|      |                            |                         | SD |         |      |                                     |                                                             |      |             |
|      | Golden eagle               | Aquila chrysaetos       | IV | 10mg/kg | SD 3 |                                     |                                                             | None |             |
|      |                            |                         | IM | 10mg/kg | 3    |                                     |                                                             | None |             |
|      |                            |                         | SD |         |      |                                     |                                                             |      |             |
| [68] | Blue-fronted amazon parrot | Amazona aestiva aestiva | IV | 15mg/kg | SD 8 | Healthy                             | immediately, 15, 30, and 1,2,4,6,8h after IV administration | None | 26-30 °C, - |
|      |                            |                         | IM | 15mg/kg | 8    | Healthy                             | 1,2,4,6,8h after IM administration                          | None | 12h light   |
|      |                            |                         | SD |         |      |                                     |                                                             |      |             |
| [69] | Red-tailed hawks           | Buteo jamaicensis       | IM | 20mg/kg | 6    | Healthy                             | 5,15,30,45min and 1,3,4,6,8,10,12, and 24h post-injection   | None | - -         |
|      |                            |                         | SD |         |      |                                     |                                                             |      |             |

|           |                     |                          |                        |    |         |                                                                                   |                        |                  |   |
|-----------|---------------------|--------------------------|------------------------|----|---------|-----------------------------------------------------------------------------------|------------------------|------------------|---|
| [70]      | Emu                 | Dromaius novaehollandiae | IV 7.2 ± 0.12 mg/kg SD | 3  | Healthy | 5,15,30,45,60,75,90 min and 2,4,5,6,8,10,12 and 24h post-injection                | None                   | Indoor enclosure | - |
| [67]      | African grey parrot | Psittacus erithacus      | IV 5mg/kg SD           | 30 | Healthy | 0,5,15,30 and 45min and 1,2,4,8,24h post-administration. 0min is before injection | None                   | -                | - |
|           |                     |                          | IV 10mg/kg SD          | 30 | Healthy |                                                                                   | None                   |                  |   |
|           |                     |                          | IV 20mg/kg SD          | 30 | Healthy |                                                                                   | None                   |                  |   |
|           |                     |                          | IM 5mg/kg SD           | 24 | Healthy | 0,15,45min and 1,2,4,8,24h post-administration                                    | None                   |                  |   |
|           |                     |                          | IM 10mg/kg SD          | 24 | Healthy |                                                                                   | None                   |                  |   |
|           |                     |                          | IM 20mg/kg SD          | 24 | Healthy |                                                                                   | None                   |                  |   |
| Ceftiofur |                     |                          |                        |    |         |                                                                                   |                        |                  |   |
| [73]      | Red-tailed hawks    | Buteo jamaicensis        | IM 10mg/kg SD          | 7  | Healthy | -                                                                                 | None                   | -                | - |
|           |                     |                          | IM 20mg/kg SD          | 7  | Healthy |                                                                                   | None                   |                  |   |
| [74]      | Ringneck dove       | Streptopelia risoria     | IM 50mg/kg SD          | 30 | Healthy | 0, 1,2,4,8,12,24,48,72,96,120,144, 168 and 192h post injection                    | 0.5, 6 untreated birds | -                | - |
| [75]      | Cattle egret        | Bubulcus ibis            | IM 20mg/kg SD          | 18 | Healthy | 1,2,4,8,12,24,48,72,96,120,144, 168,192,216,240h                                  | None                   | -                | - |
| [72]      | Cockatiel           | Nymphicus hollandicus    | IM 10mg/kg SD          | 60 | Healthy | 0, 0.5, 1, 2,4, 8,12h                                                             | None                   | -                | - |
| [72]      | Orange-winged       | Amazona amazonica        | IM 10mg/kg SD          | 27 | Healthy | 0.5, 1,2 ,4 12, 24h                                                               | None                   |                  |   |



|                    |                                       |                           |                                                                 |         |                                                     |                                                                                                                      |                                                                       |                               |   |   |
|--------------------|---------------------------------------|---------------------------|-----------------------------------------------------------------|---------|-----------------------------------------------------|----------------------------------------------------------------------------------------------------------------------|-----------------------------------------------------------------------|-------------------------------|---|---|
|                    | amazon<br>parrot                      |                           |                                                                 |         |                                                     |                                                                                                                      |                                                                       |                               |   |   |
| [77]               | Helmeted<br>guineafowl                | Numida<br>meleagris       | IM<br>SD                                                        | 10mg/kg | 14                                                  | Healthy                                                                                                              | -                                                                     | None                          | - | - |
| [76]               | American<br>flamingo                  | Phoenicopte-<br>rus ruber | IM<br>SD                                                        | 10mg/kg | 11                                                  | Healthy                                                                                                              | just prior to administration                                          | None                          | - | - |
|                    |                                       |                           | SC<br>SD                                                        | 10mg/kg | 2                                                   | Healthy                                                                                                              | and<br>2,4,8,12,24,32,48,56,72,96,144<br>and 192h post administration | None                          |   |   |
| [78]               | American<br>black duck                | Anas<br>rubripes          | IM<br>SD                                                        | 10mg/kg | 14                                                  | -                                                                                                                    | -                                                                     | None                          | - | - |
| <b>Doxycycline</b> |                                       |                           |                                                                 |         |                                                     |                                                                                                                      |                                                                       |                               |   |   |
| [79]               | Houbara<br>bustard                    | Chlamydotis<br>undulata   | IM 100mg/kg x<br>7 doses at<br>intervals of<br>7,7,7,6,6,5 days | 10      | Healthy                                             | After the first and seventh<br>injection at the following<br>intervals: 0 (before<br>injection),12,24,36,48,72,96,14 | None                                                                  | 9.4-<br>31.8 °C,<br>13h light | - |   |
|                    |                                       |                           | SC 100mg/kg x<br>7 doses at<br>intervals of<br>7,7,7,6,6,5 days | 4       | Healthy                                             | 4,168 (just before the second<br>injection),180h                                                                     | None                                                                  |                               |   |   |
| [80]               | Orange-<br>winged<br>amazon<br>parrot | Amazona<br>amazonica      | IM 100mg/kg<br>commercial<br>formulation<br>(20mg/mL) SD        | 5       | All were<br>slightly to<br>moderately<br>overweight | 3,24,48,72,96,120,144 hours<br>after injection<br>22,23,26                                                           | None                                                                  | 18-22°C,<br>12h light         | - |   |
|                    |                                       |                           | IM 100mg/kg<br>PC 75mg/mL<br>SD                                 | 4       | at the start<br>but were                            | 3,12,24,32,48,72,96,168 hours<br>after injection                                                                     | None                                                                  |                               |   |   |

|      |                            |                            |                                  |                   |                                        |                                           |                    |                                                       |  |
|------|----------------------------|----------------------------|----------------------------------|-------------------|----------------------------------------|-------------------------------------------|--------------------|-------------------------------------------------------|--|
|      |                            |                            | IM 100mg/kg 4                    | otherwise healthy | 0900-1030 on days 1,3,7,10,13,15,17,20 | None after                                |                    |                                                       |  |
|      |                            |                            | (PC 100mg/mL) SD                 |                   | injection                              |                                           |                    |                                                       |  |
|      | Goffin's cockatoo          | Cacatua goffini            | IM 100mg/kg 4 (PC 75mg/mL) SD    | Healthy           | 3,12,24,32,48,72,96,168                | hours                                     | None               |                                                       |  |
|      |                            |                            | IM 100mg/kg 4 (PC 100mg/mL) SD   | Healthy           | 0900-1030 on days 1,3,7,10,13,15,17,20 | after                                     | None               |                                                       |  |
|      | Tinneh African grey parrot | Psittacus Erithacus tinneh | IM 100mg/kg 4 (PC 100mg/mL) SD   | Healthy           | 0900-1030 on days 1,3,7,10,13,15,17,20 | after                                     | None               |                                                       |  |
|      |                            |                            | SC 100mg/kg 4 (PC 100mg/mL) SD   | Healthy           |                                        |                                           | None               |                                                       |  |
| [81] | Cockatiel                  | Nymphicus hollandicus      | IM 100mg/kg 6 q10 days x 5 doses | Healthy           | 7am on days 7,10,20,30,40,51           | 4 birds fed unmedicated pellets and water | 18-25°C, 12h light | No calcium or other dietary supplements were provided |  |
|      |                            |                            | 0.28mg/mL x 3 45 days MW         | Healthy           | 7am on days 10,20,30,45                |                                           |                    |                                                       |  |
|      |                            |                            | 0.83mg/mL x 6 45 days MW         | Healthy           | 7am on days 3,7,15,25,35,45            |                                           |                    |                                                       |  |
|      |                            |                            | 500mg/kg seed mixture x 45 days  | Healthy           |                                        | 6 birds fed unmedicated mixed             |                    |                                                       |  |

|      |            |                             |                                  |         |                                                  |                                                           |                                                                                                |                       |                                                                                              |
|------|------------|-----------------------------|----------------------------------|---------|--------------------------------------------------|-----------------------------------------------------------|------------------------------------------------------------------------------------------------|-----------------------|----------------------------------------------------------------------------------------------|
|      |            |                             | 1000mg/kg<br>mash x 45 days      | 6       | Healthy                                          | 7am on days 3 and 7                                       | seeds and<br>water<br>6 birds fed<br>unmedica<br>ted mash<br>and water                         |                       |                                                                                              |
| [82] | Cockatiel  | Nymphicus<br>hollandicus    | 300mg/kg<br>pellets x<br>47 days | 9 of 47 | Healthy                                          | 830am on<br>3,7,14,21,28,35,42<br>days                    | 6 birds fed<br>unmedica<br>ted pellets                                                         | 20-24°C,<br>10h light | No<br>cuttlebone,<br>mineral<br>blocks or<br>other<br>nutritional<br>supplements<br>provided |
| [83] | Cockatiel  | Nymphicus<br>hollandicus    | 400mg/L x<br>30 days MW          | 11      | Naturally<br>infected with<br>spiral<br>bacteria | -                                                         | 7 birds<br>naturally<br>infected<br>with<br>spiral<br>bacteria<br>fed<br>unmedica<br>ted water | -                     | -                                                                                            |
| [84] | Budgerigar | Melopsittacu<br>s undulatus | 300mg/kg<br>seeds x 42 days      | - of    | Healthy                                          | morning on treatment days<br>4,7,14,21,28,35,42 or in the | Fed<br>unmedica                                                                                | -                     | -                                                                                            |

|      |                             |                           |                              |      |                             |                                 |                               |                    |                                                                                                                                                                                       |
|------|-----------------------------|---------------------------|------------------------------|------|-----------------------------|---------------------------------|-------------------------------|--------------------|---------------------------------------------------------------------------------------------------------------------------------------------------------------------------------------|
|      |                             |                           | 0,50,100,200,400mg/L x14d MW | -    | Healthy                     | afternoon on days 12,26, and 40 | ted seeds and water           |                    |                                                                                                                                                                                       |
| [85] | African grey parrot         | Psittacus                 | 400mg/L x 7 4 days MW        |      | Healthy                     | Days 3 and 7                    | None                          | 18-22°C, 12h light | Birds switched from pelleted feed to commercial parrot seed diet 8 days before starting the trial to avoid possible chelation of doxycycline by calcium present in the pelleted feed. |
|      |                             | Erithacus tinneh          | 800mg/L x 7 4 days MW        |      | Healthy                     |                                 | None                          |                    |                                                                                                                                                                                       |
|      |                             |                           | 800mg/L x 42 7 days MW       |      | Healthy                     | 0830 on days 4,7,14,21,28,35,42 | 4 birds fed unmedicated water |                    |                                                                                                                                                                                       |
|      | Goffin's cockatoo           | Cacatua goffini           | 400mg/L x 7 4 days           |      | Healthy                     | Days 3 and 7                    | None                          |                    |                                                                                                                                                                                       |
|      |                             |                           | 800mg/L x 7 4 days           |      | Healthy                     |                                 | None                          |                    |                                                                                                                                                                                       |
|      |                             |                           | 800mg/L x 42 8 days MW       |      | Healthy                     | 0830 on days 4,7,14,21,28,35,42 | 4 birds fed unmedicated water |                    |                                                                                                                                                                                       |
|      | Orange-winged amazon parrot | Amazona amazonica         | 400mg/L x 7 4 days           |      | Some were moderately        | Days 3 and 7                    | None                          |                    |                                                                                                                                                                                       |
|      |                             |                           | 800mg/L x 7 4 days           |      | obese but otherwise healthy | Days 3 and 7                    | None                          |                    |                                                                                                                                                                                       |
| [86] | Blue-and-gold macaw,        | Ara ararauna<br>Ara macao | 1000mg/kg of corn x 45 days  | 10 3 | Healthy                     | Days 3,15,30,45                 | None                          | -                  | -                                                                                                                                                                                     |

|      |                                                                       |                                                                                        |                                                                      |                  |                                                                                       |                                                                                       |                                               |                          |                                                           |  |
|------|-----------------------------------------------------------------------|----------------------------------------------------------------------------------------|----------------------------------------------------------------------|------------------|---------------------------------------------------------------------------------------|---------------------------------------------------------------------------------------|-----------------------------------------------|--------------------------|-----------------------------------------------------------|--|
|      | scarlet macaw                                                         |                                                                                        |                                                                      |                  |                                                                                       |                                                                                       |                                               |                          |                                                           |  |
| [87] | beautiful fruit black-naped dove, Jambu fruit doves, ring-necked dove | Ptilinopus pulchellus, Ptilinopus melanospila, ptilinopus jambu, streptopelia capicola | 500mg/L x 45 days MW                                                 | 18               | 5/18 birds were tested positive for C.psittaci by PCR testing of choano-cloacal swabs | 1100 on days 3,8,14,21,35,42                                                          | None                                          | 10.5h light              | -                                                         |  |
| [88] | Common ostrich                                                        | Struthio camelus                                                                       | IV 15mg/kg SD<br>IM 15mg/kg SD<br>PO 15mg/kg SD                      | 10<br>10<br>10   | Healthy                                                                               | At 0 (pretreatment), 0.08, 0.25, 0.5,1,2,4,6,8,12,24,48h after administering the drug | None                                          | Isolated open system pen | Food withheld 12h before and 6h after drug administration |  |
| [89] | Cockatiel                                                             | Nymphicus hollandicus                                                                  | PO gavage 35mg/kg q24h x 21 days<br>PO gavage 35mg/kg q24h x 45 days | crop 8<br>crop 8 | Healthy cockatiels artificially infected with Chlamydia psittaci                      | On days 14 and 21 2-4h after drug administration                                      | 6 artificially infected and non-treated birds | 12h photoperiod          | -                                                         |  |

|      |                                                                    |   |                                       |    |                                                 |              |      |   |   |
|------|--------------------------------------------------------------------|---|---------------------------------------|----|-------------------------------------------------|--------------|------|---|---|
| [90] | Exotic<br>columbiformes for a<br>zoo (species<br>not<br>mentioned) | - | PO oral gavage<br>50mg/kg x OD<br>45d | 38 | Birds<br>infected with<br>chlamydia<br>psittaci | Not measured | None | - | - |
|------|--------------------------------------------------------------------|---|---------------------------------------|----|-------------------------------------------------|--------------|------|---|---|
